# Supplementary material for: ISB 2001 trispecific T cell engager shows strong tumor cytotoxicity and overcomes immune escape mechanisms of multiple myeloma cells
Source: PubMed Central journal article supplement (PMC11505469; doi:10.1038/s43018-024-00821-1), 2024-09-11
Supplement: 43018_2024_821_MOESM1_ESM.pdf [file 43018_2024_821_MOESM1_ESM.pdf]

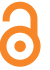

---

# **ISB 2001 trispecific T cell engager shows strong tumor cytotoxicity and overcomes immune escape mechanisms of multiple myeloma cells**

---

In the format provided by the authors and unedited

---

## Supplementary Figures

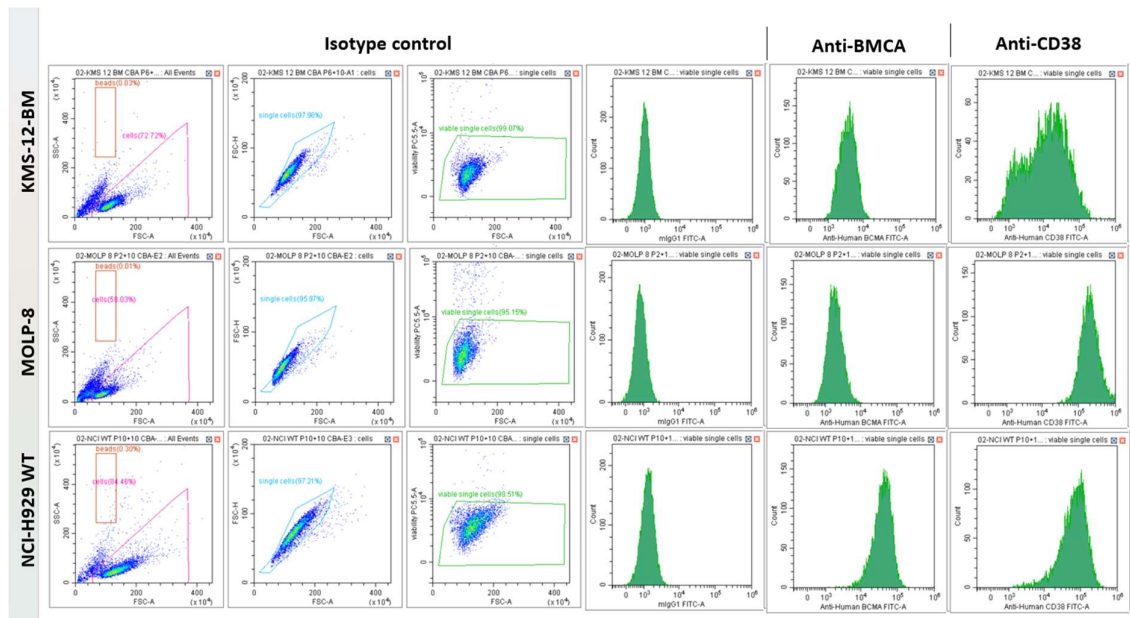

Supplementary Figure 1 (support Raw data of ED 3F). Gating strategy for assessment of the BCMA and CD38 human antibody binding capacity (BioCytex) on three MM cell lines (KMS-12-BM, NCI-H929 and MOLP-8).

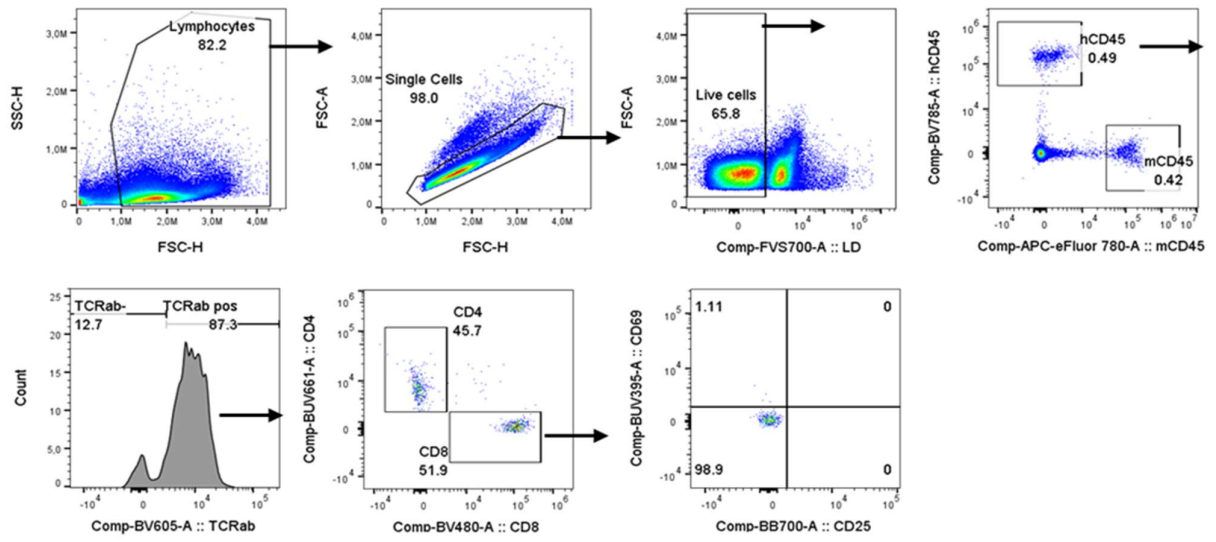

Supplementary Figure 2 (Support Raw data of ED 7B). Full Flow Cytometry gating strategy to identify % CD25+ or % CD69+ of CD8+ T cells in Spleen at day 2.
